# Supplementary material
Source: publisher figshare collection journal article supplement (https://gsajournals.figshare.com/ndownloader/files/15051575)
Supplement: Supplementary file 1 [file 15051575]

## Sheet: Table S7
Table S7. Enriched GO terms identified in commonly expressed genes downregulated in trametinib-treated versus vehicle-treated tg melanoma medaka.
Database	Name	ID	fold enrichment; p-val
biological process	regulation of focal adhesion assembly	GO:0051893	O=2;E=0.02;R=86.57;rawP=0.0002
	protein-chromophore linkage	GO:0018298	O=2;E=0.01;R=173.14;rawP=5.65e-05
	motor neuron axon guidance	GO:0008045	O=2;E=0.02;R=102.31;rawP=0.0002
	regulation of cell-substrate junction assembly	GO:0090109	O=2;E=0.02;R=86.57;rawP=0.0002
	negative regulation of chemotaxis	GO:0050922	O=2;E=0.02;R=102.31;rawP=0.0002
	negative regulation of behavior	GO:0048521	O=2;E=0.03;R=77.61;rawP=0.0003
	focal adhesion assembly	GO:0048041	O=2;E=0.04;R=52.34;rawP=0.0006
	phototransduction	GO:0007602	O=2;E=0.03;R=60.83;rawP=0.0005
	response to external stimulus	GO:0009605	O=6;E=1.18;R=5.10;rawP=0.0005
	regulation of tissue remodeling	GO:0034103	O=2;E=0.04;R=53.59;rawP=0.0006
molecular function	photoreceptor activity	GO:0009881	O=2;E=0.01;R=169.82;rawP=5.90e-05
	cysteine-type endopeptidase inhibitor activity	GO:0004869	O=2;E=0.04;R=49.95;rawP=0.0007
	endopeptidase regulator activity	GO:0061135	O=2;E=0.13;R=15.07;rawP=0.0075
	tetrapyrrole binding	GO:0046906	O=2;E=0.11;R=18.33;rawP=0.0051
	glycosaminoglycan binding	GO:0005539	O=2;E=0.14;R=14.64;rawP=0.0079
	heme binding	GO:0020037	O=2;E=0.10;R=19.59;rawP=0.0045
	peptidase inhibitor activity	GO:0030414	O=2;E=0.14;R=14.81;rawP=0.0077
	endopeptidase inhibitor activity	GO:0004866	O=2;E=0.13;R=15.44;rawP=0.0071
	carbohydrate derivative binding	GO:0097367	O=2;E=0.15;R=13.48;rawP=0.0093
	peptidase regulator activity	GO:0061134	O=2;E=0.16;R=12.37;rawP=0.0109
